# Supplementary material for: MXene boosted MOF-derived cobalt sulfide/carbon nanocomposites as efficient bifunctional electrocatalysts for OER and HER
Source: Royal Society of Chemistry journal article supplement (doi:10.1039/d4na00290c), 2024-01-01
Supplement: d4na00290c1.pdf [file d4na00290c1.pdf]

## *Supplementary materials*

# **MXene boosted MOF-derived cobalt sulfide/carbon nanocomposites as efficient bifunctional electrocatalysts for OER and HER**

Komal Farooq,<sup>1,2</sup> Maida Murtaza,<sup>1</sup> Zhuxian Yang,<sup>2</sup> Amir Waseem,<sup>1</sup> Yanqiu Zhu<sup>2</sup>  
and Yongde Xia<sup>\*2</sup>

<sup>1</sup>*Department of Chemistry, Quaid-i-Azam University, Islamabad-45320, Pakistan*

<sup>2</sup>*Department of Engineering, Faculty of Environment, Science and Economy, University of Exeter, Exeter EX4 4QF, United Kingdom. E-mail: [y.xia@exeter.ac.uk](mailto:y.xia@exeter.ac.uk)*

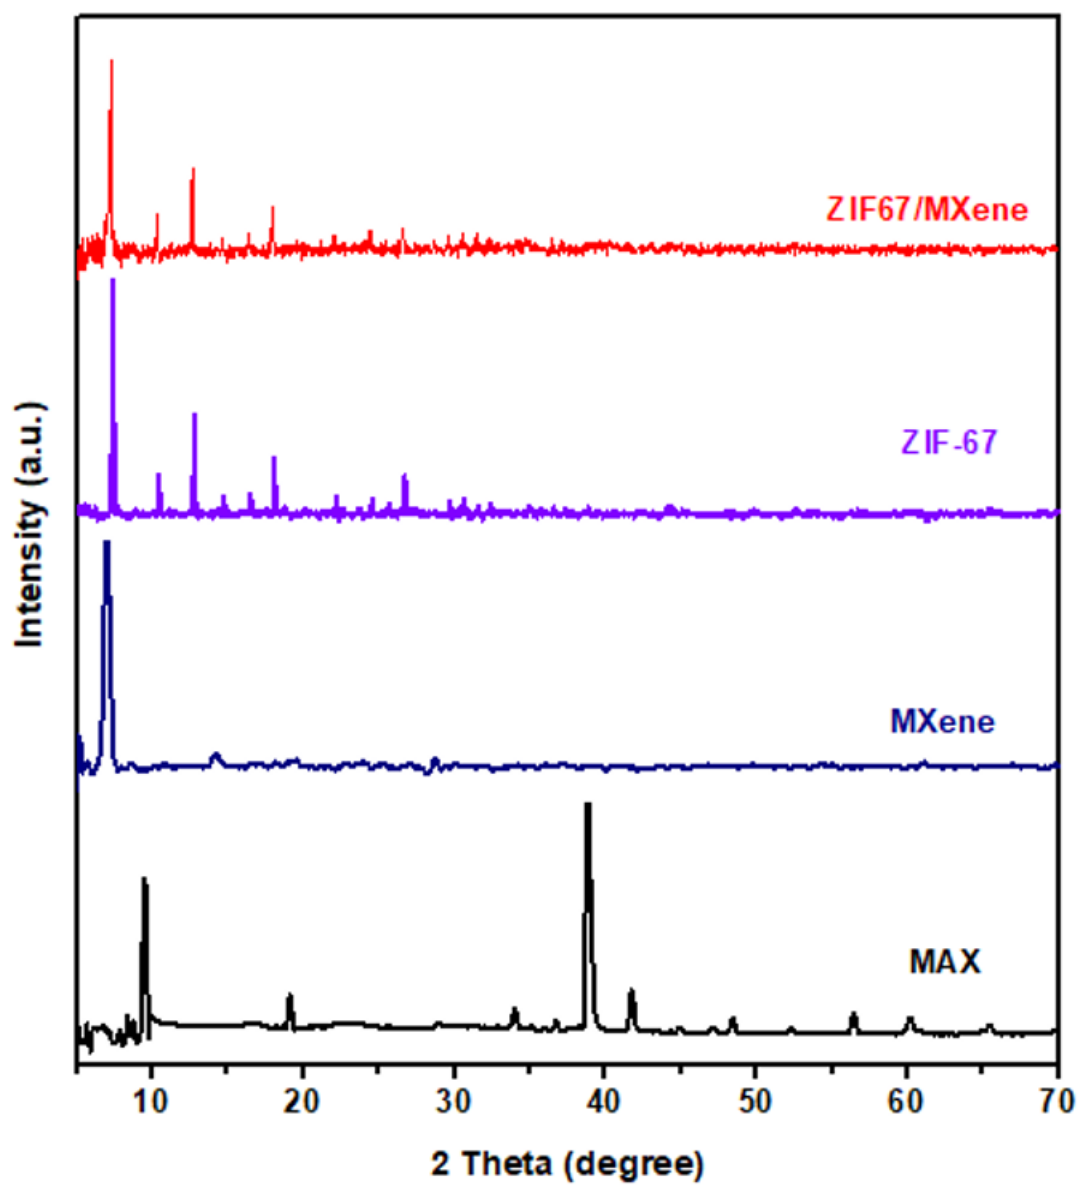

**Fig. S1** Powder XRD patterns of MAX, MXene, ZIF-67 and ZIF67/MXene samples.

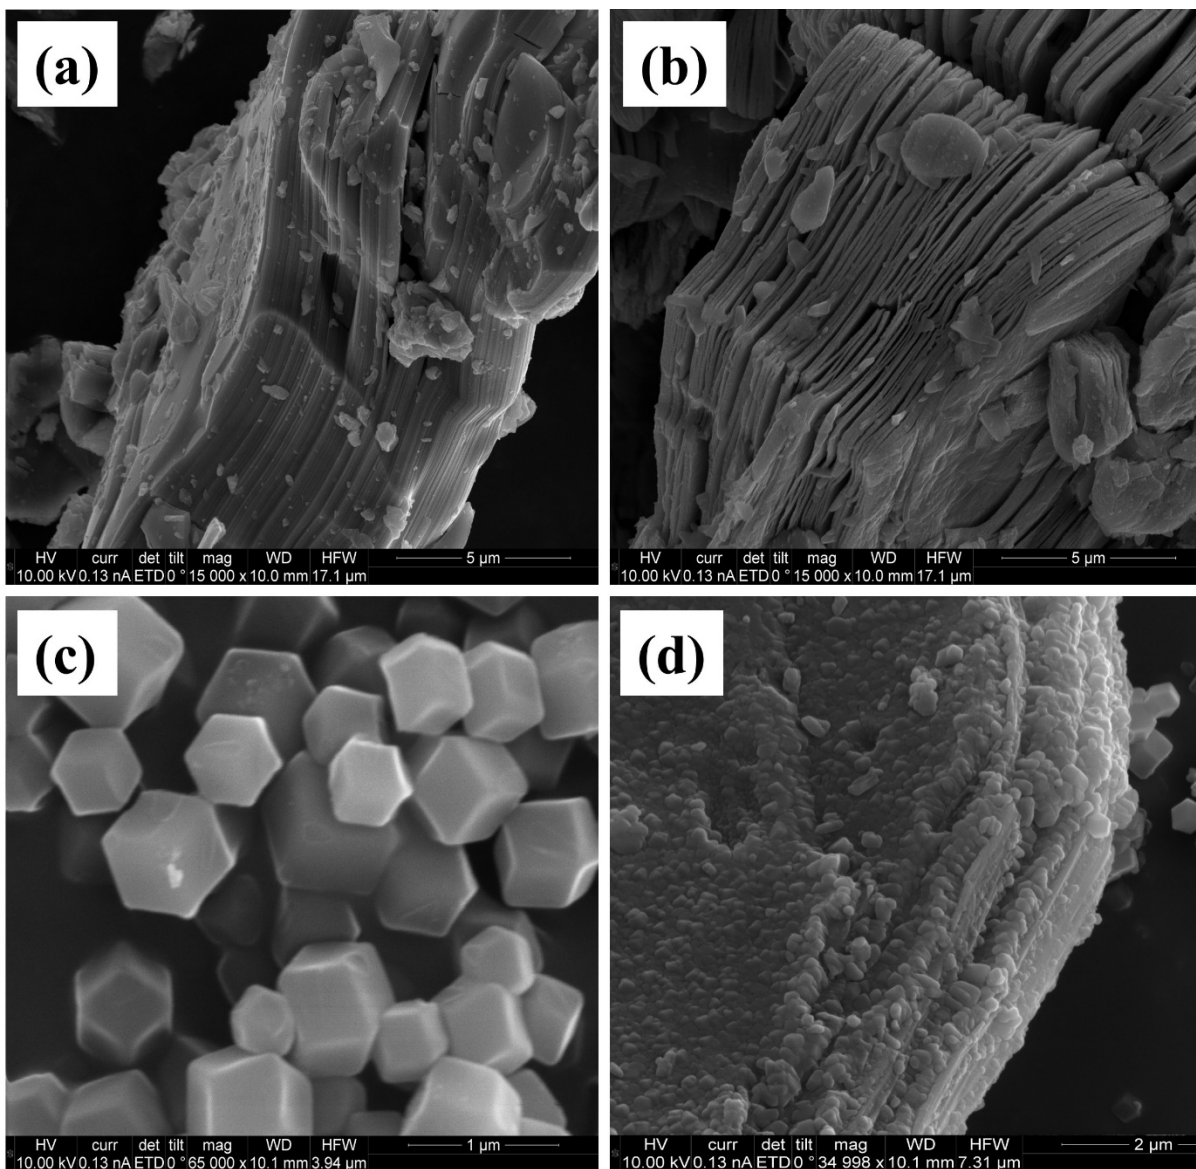

**Fig. S2** FESEM images of (a) MAX; (b) MXene; (c) ZIF-67 and (d) ZIF67/MXene.

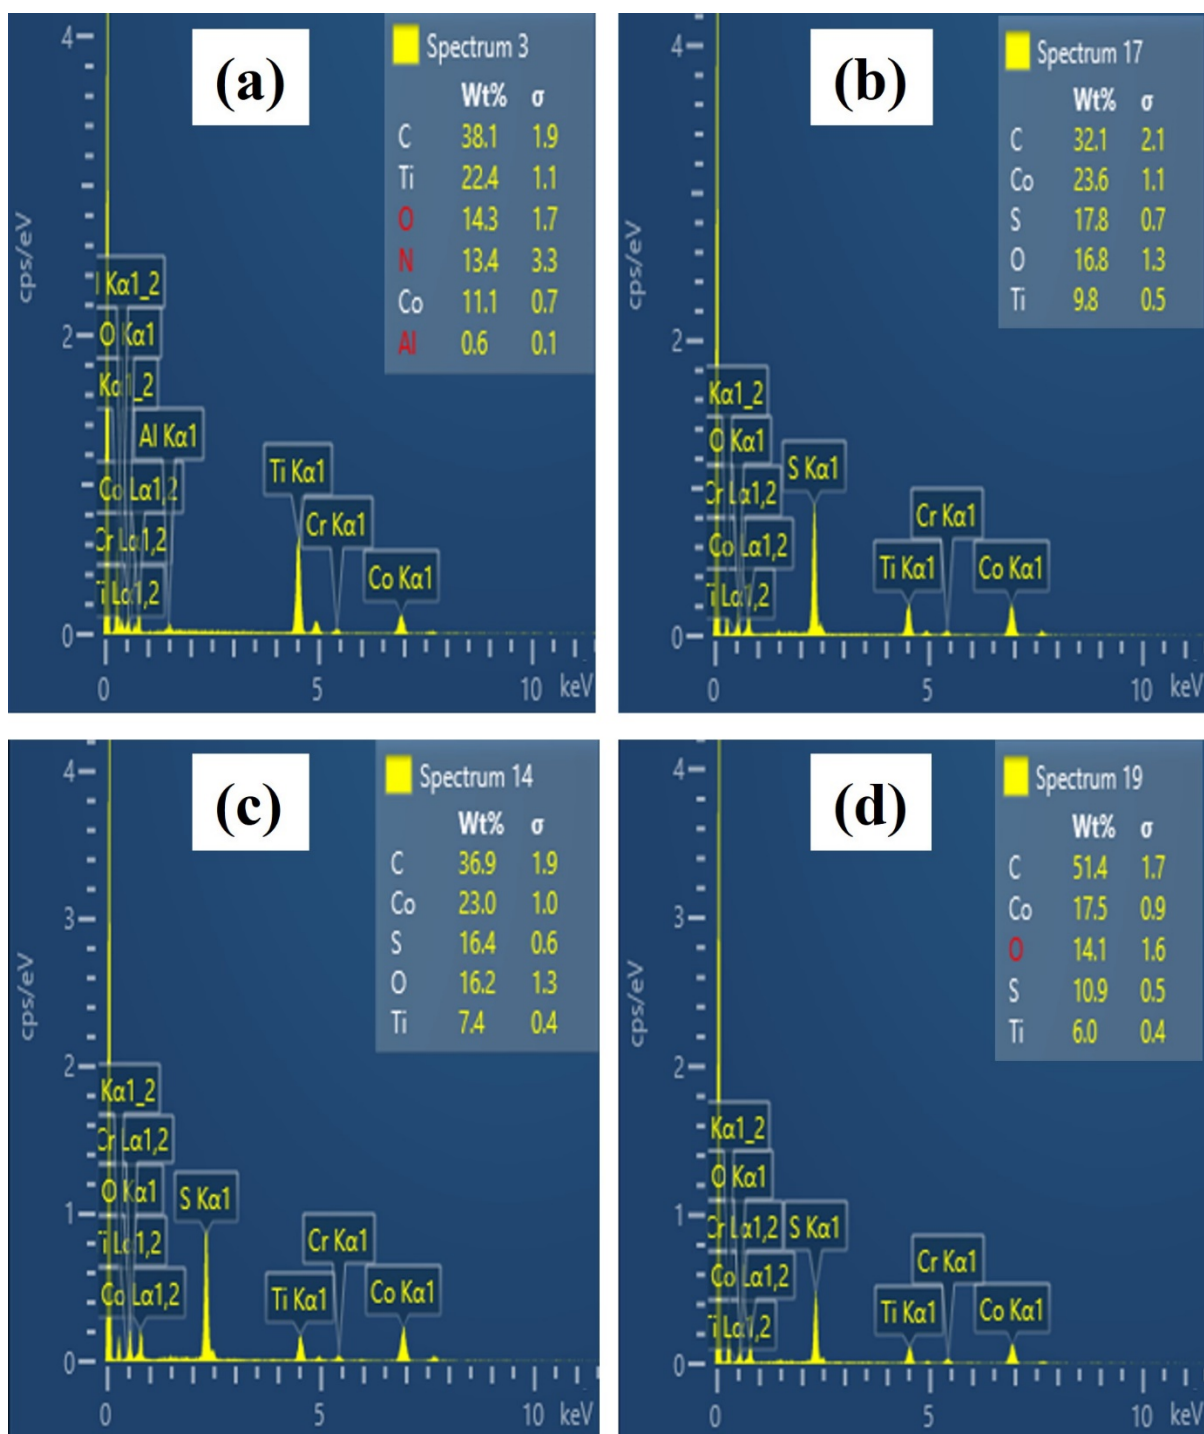

**Fig. S3** EDX element analysis of (a) ZIF67/MXene; (b) CSMX-700; (c) CSMX-800 and (d) CSMX-900.

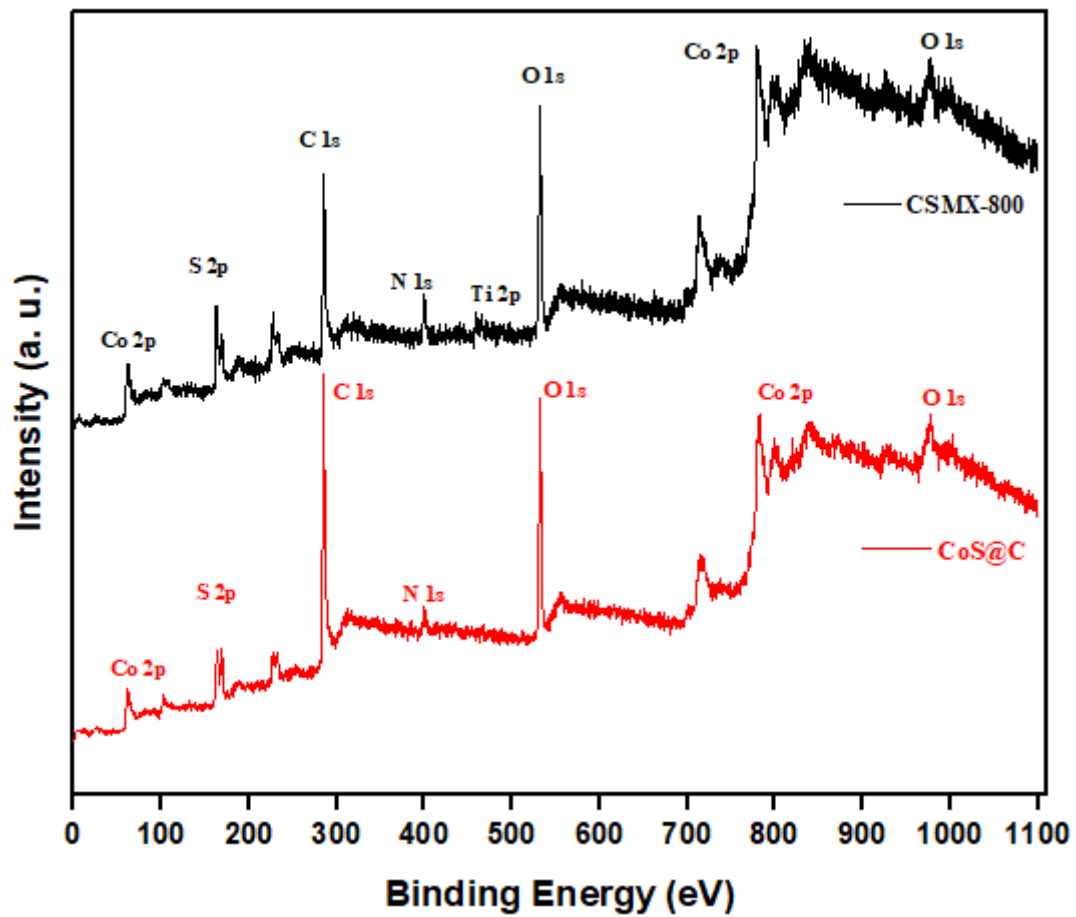

**Fig. S4** XPS element survey spectrum of representative samples CSMX-800 and CoS@C.

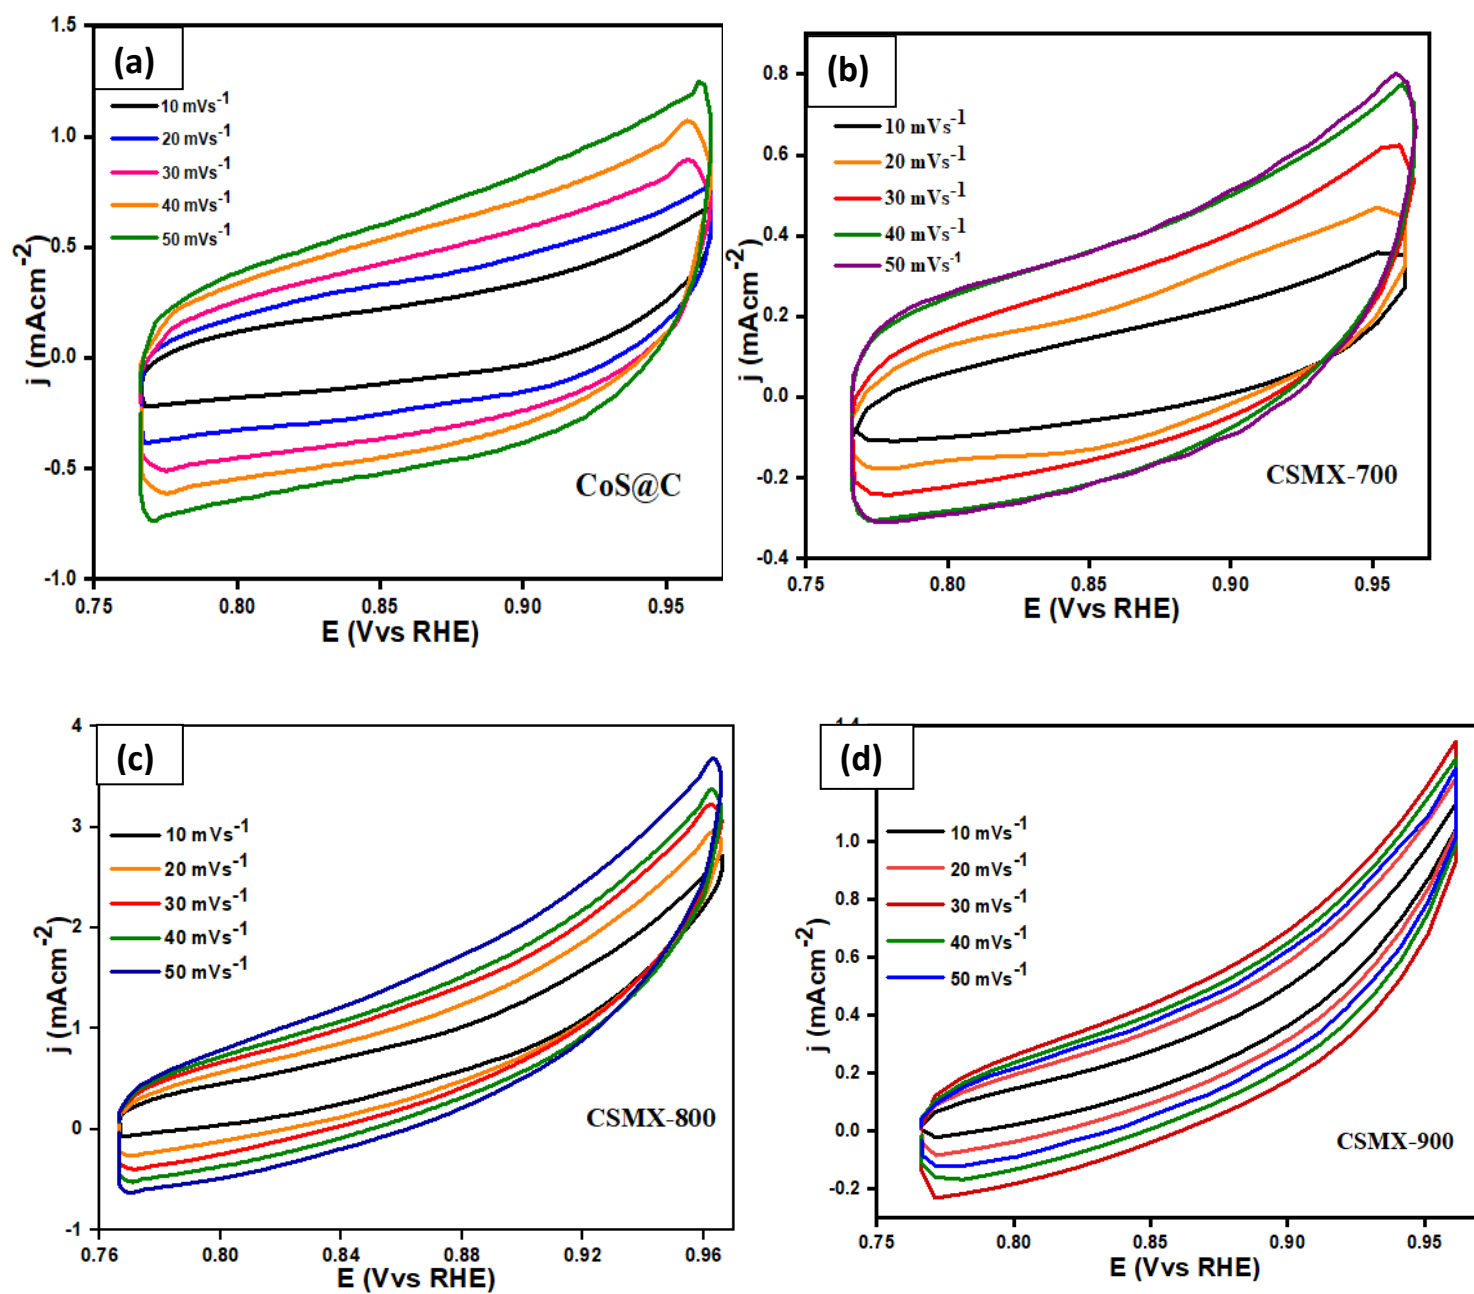

**Fig. S5** Non-faradic region cyclic voltammogram at various scanning rates of (a) CoS@C, (b) CSMX-700, (c) CSMX-800 and (d) CSMX-900.

**Table S1** Textural properties of studied samples

| Sample                                               | CSMX-700 | CSMX-800 | CSMX-900 | CoS@C |
|------------------------------------------------------|----------|----------|----------|-------|
| Surface area (m <sup>2</sup> g <sup>-1</sup> )       | 160      | 166      | 172      | 211   |
| Total pore volume (cm <sup>3</sup> g <sup>-1</sup> ) | 0.13     | 0.15     | 0.21     | 0.22  |

**Table S2** Overpotential and Tafel slope values for OER and HER

| Electrocatalyst | OER overpotential value at 10 mA cm <sup>-2</sup> (mV vs. RHE) | Tafel slope (mV dec <sup>-1</sup> ) | HER overpotential value at 10 mA cm <sup>-2</sup> (mV vs. RHE) | Tafel slope (mV dec <sup>-1</sup> ) |
|-----------------|----------------------------------------------------------------|-------------------------------------|----------------------------------------------------------------|-------------------------------------|
| CSMX-700        | 339                                                            | 134                                 | 323                                                            | 283                                 |
| CSMX-800        | 257                                                            | 95                                  | 190                                                            | 103                                 |
| CSMX-900        | 305                                                            | 100                                 | 265                                                            | 223                                 |
| CoS@C           | 403                                                            | 137                                 | 496                                                            | 310                                 |

**Table S3** C<sub>dl</sub>, ECSA and R<sub>f</sub> values of samples

| Electrocatalyst | C <sub>dl</sub> (mF) | ECSA (cm <sup>2</sup> ) | R <sub>f</sub> <sup>*</sup> |
|-----------------|----------------------|-------------------------|-----------------------------|
| CSMX-700        | 0.011                | 0.55                    | 7.78                        |
| CSMX-800        | 0.0237               | 1.185                   | 16.76                       |
| CSMX-900        | 0.016                | 0.8                     | 11.31                       |
| CoS@C           | 0.014                | 0.7                     | 9.90                        |

\*Roughness factor R<sub>f</sub> = ECSA/electrode's geometrical area.
